# Supplementary material
Source: MDPI journal article supplement (https://www.mdpi.com/2073-4344/12/11/1471)
Supplement: s1 [file s1]

# Novel Indium Vanadium Oxide Nanosheet-Supported Nickel Iron Oxide Nanoplate Heterostructure for Synergistically Enhanced Photocatalytic Degradation of Tetracycline

Sreeram N <sup>1</sup>, Aruna V <sup>1,2,\*</sup>, Ravindranadh Koutavarapu <sup>3,\*</sup>, Dong-Yeon Lee <sup>3,\*</sup> and Jaesool Shim <sup>4,\*</sup>

<sup>1</sup> Department of Physics, Acharya Nagarjuna University, Nagarjuna Nagar, Guntur 522 510, Andhra Pradesh, India

<sup>2</sup> Department of Physics, Bapatla Engineering College, Bapatla 522 102, Andhra Pradesh, India

<sup>3</sup> Department of Robotics Engineering, College of Mechanical and IT Engineering, Yeungnam University, Gyeongsan 38541, Republic of Korea

<sup>4</sup> School of Mechanical Engineering, Yeungnam University, Gyeongsan 38541, Republic of Korea

\* Correspondence: vereddigiaruna@gmail.com (V.A.); ravindra\_physicist@ynu.ac.kr (R.K.); dylee@ynu.ac.kr (D.-Y.L.); jshim@ynu.ac.kr (J.S.)

## 1.1. Reagents

NH<sub>4</sub>VO<sub>3</sub>, InCl<sub>3</sub>·4H<sub>2</sub>O, HNO<sub>3</sub>, FeCl<sub>3</sub>·6H<sub>2</sub>O, NiCl<sub>2</sub>·6H<sub>2</sub>O, ethylene glycol, benzoquinone, triethanolamine, and isopropyl alcohol were purchased from Sigma-Aldrich. All chemicals were used without further purified.

## 1.2. Characterizations

X-ray diffraction was analyzed through a Shimadzu 6100 X-ray diffractometer with Cu K $\alpha$  radiation. Field emission scanning electron microscopy images and energy dispersive X-ray spectra of prepared samples were conducted through a HITACHI, S-4800 system. A HITACHI H-7600 electron microscope was used to obtain transmission electron microscopy (TEM) images, as well as Tecnai G2 F20 S-Twin electron microscope was used to obtain high-resolution transmission electron microscopy (HRTEM) images. A Thermo Scientific K $\alpha$  X-ray source was used for collect X-ray photoelectron spectroscopy. The UV-vis diffuse reflectance spectra were performed on a VARIAN, Cary 5000 spectrophotometer. The photoluminescence spectra of the catalysts were examined through a Horiba IHR550 fluorescence spectrophotometer.

## 1.3. Photocatalytic test

The photocatalytic performance of as-prepared samples was evaluated for the removal of tetracycline (TC) under visible light irradiation. In general, 15 mg of InVO<sub>4</sub>/NiFe<sub>2</sub>O<sub>4</sub> photocatalyst was added to 50 mL of TC aqueous solution (40 mg/L) followed by sonication for 2 min for homogenization. Prior to illumination, the reaction system was vigorously stirred for half an hour in the darkness to reach the adsorption-desorption equilibrium. In turn, the above suspension was expose to visible light. Further, the photocatalytic performance of the prepared catalysts was evaluated by using a 100-W solar simulator. In the meantime, 3 mL of reaction suspensions were collected at given time interval and separated by centrifugation.

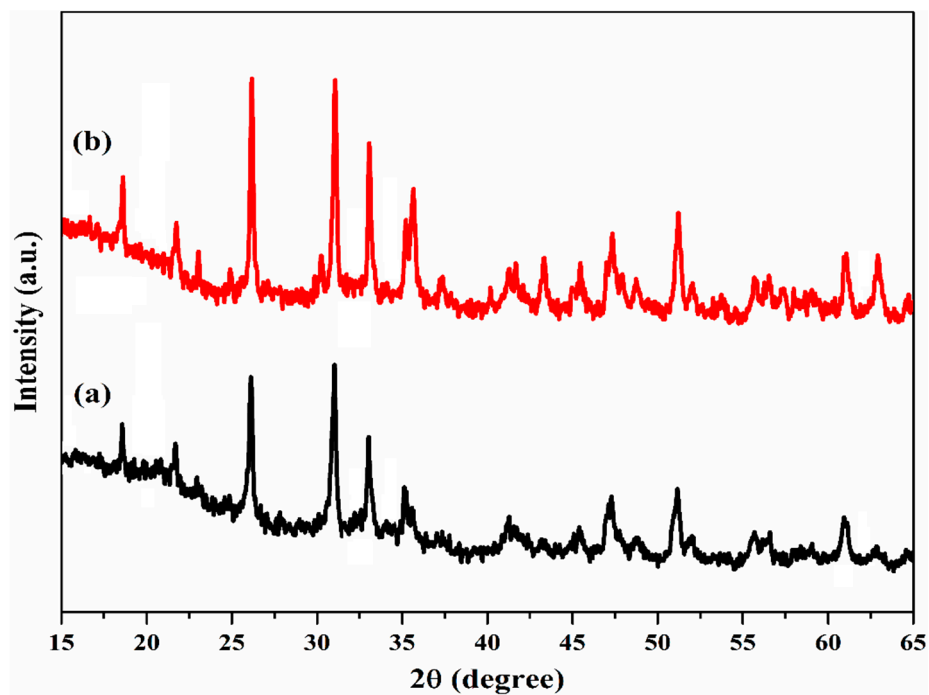

**Figure S1.** XRD pattern of IVNF-5.0 nanocomposite (a) before and (b) after photocatalytic activity.

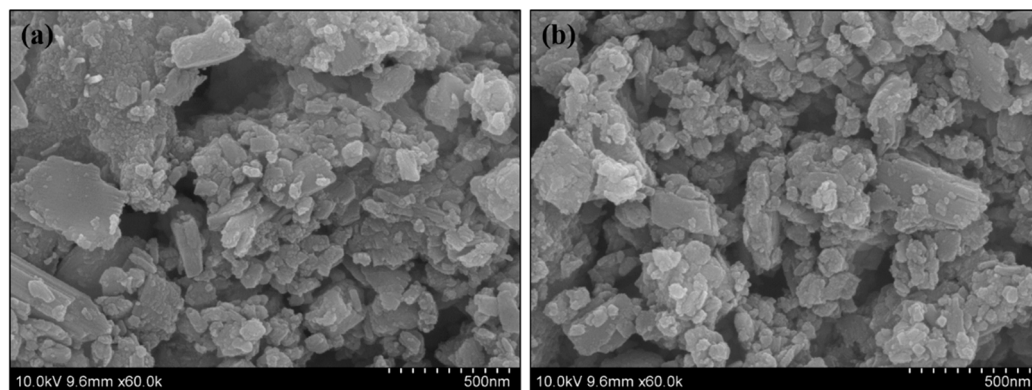

**Figure S2.** SEM images of IVNF-5.0 nanocomposite (a) before and (b) after photocatalytic activity.

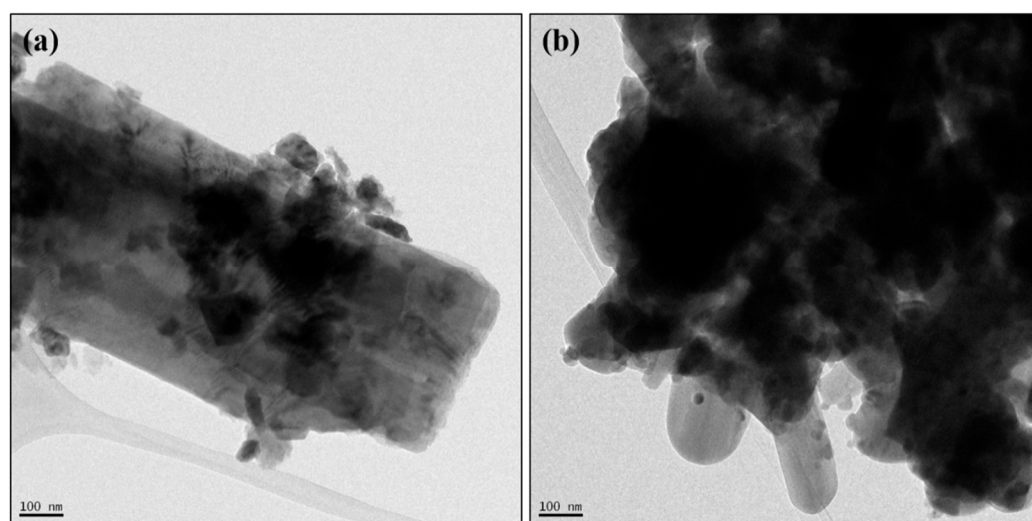

**Figure S3.** TEM images of IVNF-5.0 nanocomposite (a) before and (b) after photocatalytic activity.
